# Supplementary material for: The performance of body mass component indices in detecting risk of musculoskeletal injuries in physically active young men and women
Source: PubMed Central journal article supplement (PMC8800385; doi:10.7717/peerj.12745), 2022-01-26
Supplement: peerj-10-12745-s002.pdf [file peerj-10-12745-s002.pdf]

Imię: .....Nazwisko: .....Data urodzenia: .....

1. Czy podejmujesz jakąkolwiek aktywność fizyczną? Tak  Nie

2. Czy posiadasz klasę sportowa? Tak  Nie

3. **URAZ** definiujemy jako powstanie dolegliwości w czasie podejmowanej aktywności fizycznej w wyniku, której doszło do pojawienia się bólu i/lub dyskomfortu w obrębie układu ruchu powodując czasowe ograniczenie lub zupełny brak możliwości kontynuowania aktywności fizycznej.

Czy doznałeś/doznałaś jakiegokolwiek urazu układu ruchu w okresie od 01.10.2017 do 01.10.2018.?

Tak \*(uzupełnij poniższą tabelę) Nie

4. Wypełnij poniższą tabelę wpisując **LICZBĘ** urazów w komórkę odpowiadającą części ciała, której dotyczył uraz odniesiony w okresie od 01.10.2017 do 01.10.2018.

| Część ciała          | Liczba urazów |
|----------------------|---------------|
| Głowa, szyja, tułów  |               |
| Kończyna górna lewa  |               |
| Kończyna górna prawa |               |
| Kończyna dolna lewa  |               |
| Kończyna dolna prawa |               |

5. Czy któryś z urazów został odniesiony w ciągu **ostatnich 6 tygodni** do dziś?

Tak  Nie
