# Supplementary material for: The performance of body mass component indices in detecting risk of musculoskeletal injuries in physically active young men and women
Source: PubMed Central journal article supplement (PMC8800385; doi:10.7717/peerj.12745), 2022-01-26
Supplement: peerj-10-12745-s004.pdf [file peerj-10-12745-s004.pdf]

## Załącznik 2 Akieta IPAQ

IMIE..... NAZWISKO.....

### Międzynarodowy Kwestionariusz Aktywności Fizycznej

Chciał(a)byś obecnie zadać kilka pytań dotyczących czasu spędzanego na czynnościach wymagających aktywności fizycznej. Dotyczą one wszystkich rodzajów aktywności fizycznej związane z życiem codziennym, z pracą i z wypoczynkiem. Pytania te zadajemy wszystkim, niezależnie od tego, czy ktoś uważa się za osobę aktywną fizycznie, czy też nie.

Pytania będą dotyczyły czynności związanych z aktywnością fizyczną w ciągu ostatnich 7 dni, tzn. od ..... (podać dzień tygodnia) do wczoraj.

NAJPIERW JEDNAK CHCIAŁ(A)BYM ZAPYTAĆ, NA ILE OSTATNIE 7 DNI BYŁY TYPOWE, BIORĄC POD UWAGĘ NORMALNIE WYKONYWANE CZYNNOŚCI.

Czy w ciągu ostatnich 7 dni, tzn. od ..... (podać dzień tygodnia) do wczoraj :

- |                                                                           |     |     |
|---------------------------------------------------------------------------|-----|-----|
| a. przez cały czas lub część czasu przebywał P. w szpitalu.....           | Tak | Nie |
| b. przez cały czas lub część czasu był P. chory.....                      | Tak | Nie |
| c. przez cały czas lub część czasu odbywał P zajęcia rehabilitacyjne..... | Tak | Nie |
| d. przez cały czas lub część czasu przebywał P na urlopie.....            | Tak | Nie |
| e. jest P. w okresie rekonwalescencji po przebytej chorobie.....          | Tak | Nie |
| f. (tylko dla kobiet) jest P. w ciąży.....                                | Tak | Nie |

Proszę teraz pomyśleć o wszystkich czynnościach wykonywanych w ciągu ostatnich 7 dni w domu i w jego otoczeniu, w pracy zawodowej, związanych z przemieszczaniem się z miejsca na miejsce, np. drodze do pracy i z pracy, robieniu zakupów. Proszę także uwzględnić czynności wykonywane w czasie wolnym, tj. spacer, rekreacja, praca na działce, ćwiczenia fizyczne oraz sport. Najpierw zapytam P. o czynności wymagające dużego wysiłku fizycznego, następnie o czynności wymagające umiarkowanego, średniego wysiłku, a na koniec o spacer i inne czynności związane z chodzeniem oraz siedzeniem.

Na początek proszę przypomnieć sobie wszystkie czynności wymagające intensywnego wysiłku fizycznego, wykonywane w ciągu ostatnich 7 dni.

**Intensywny wysiłek fizyczny** wywołuje bardzo szybkie oddychanie i bardzo szybkie bicie serca

Intensywnego wysiłku fizycznego wymaga np. dźwiganie ciężkich przedmiotów, kopanie ziemi, aerobik, szybki bieg, szybka jazda rowerem. Interesują nas tylko czynności, które trwały co najmniej 10 min. bez przerwy.

1. Czy w ciągu ostatnich 7 dni wykonywał/a P. czynności wymagające intensywnego wysiłku fizycznego?

Tak – przez ile dni w ciągu ostatniego tygodnia? ..... dni

Nie (przejdź do pyt. 3)

Nie wiem/Nie jestem pewien(a) (przejdź do pyt. 3)

2. Przeciętnie ile czasu wykonywał/a P. czynności wymagające intensywnego wysiłku fizycznego w ciągu takiego dnia?

..... minut dziennie

Nie wiem/Nie jestem pewien(a)

A teraz proszę przypomnieć sobie wszystkie czynności wymagające umiarkowanego (średniego) wysiłku fizycznego wykonywane w ciągu ostatnich 7 dni.

**Umiarkowany wysiłek fizyczny** prowadzi do trochę szybszego oddychania i trochę szybszego bicia serca

Umiarkowanego wysiłku fizycznego wymaga np. noszenie lżejszych ciężarów, jazda rowerem w normalnym tempie, gra w siatkówkę lub bardzo szybki marsz. Proszę jednak nie brać pod uwagę chodzenia. Chodzi znowu tylko czynności, które trwały co najmniej 10 minut bez przerwy.

3. Czy w ciągu ostatnich 7 dni wykonywał/a P. czynności wymagające umiarkowanego, średniego wysiłku fizycznego?

Tak – przez ile dni w ciągu ostatniego tygodnia? ..... dni

Nie (przejdź do pyt. 5)

Nie wiem/Nie jestem pewien(a) (przejdź do pyt. 5)

4. Przeciętnie ile czasu wykonywał/a P. czynności wymagające umiarkowanego wysiłku fizycznego w ciągu takiego dnia?

..... minut dziennie

Nie wiem/Nie jestem pewien(a)

Teraz proszę przypomnieć sobie, ile czasu zajęło Panu/Pani chodzenie w ciągu ostatnich 7 dni. Interesuje nas chodzenie związane z pracą, chodzenie ulicą, np. po zakupy, do pracy, a także o spacer. Chodzi znowu o chodzenie, które trwało co najmniej 10 minut bez przerwy.

5. Czy w ciągu ostatnich 7 dni chodził/a P. co najmniej 10 min. bez przerwy?

Tak – przez ile dni w ciągu ostatniego tygodnia? ..... dni

Nie (przejdź do pyt. 7)

Nie wiem/Nie jestem pewien(a) (przejdź do pyt. 7)

6. Przeciętnie ile czasu poświęcał/a P. na chodzenie lub spacer w ciągu takiego dnia?

..... minut dziennie

Nie wiem/Nie jestem pewien(a)

A ile czasu w ostatnim tygodniu spędzał Pan/Pani siedząc? Tym razem proszę uwzględnić tylko dni powszednie, tzn. proszę pominąć sobotę i niedzielę. Chodzi np. o siedzenie przy biurku, siedzenie podczas odwiedzin u znajomych, podczas czytania, a także siedzenie lub leżenie podczas oglądania telewizji. Proszę uwzględnić czas spędzony na siedzeniu w domu, w pracy, w szkole, w pojazdach i w innych miejscach.

7. Biorąc pod uwagę dni powszednie w ciągu ostatniego tygodnia, ile zazwyczaj czasu w ciągu dnia spędzał/a P. siedząc?

..... minut dziennie

Nie wiem/Nie jestem pewien(a)
