# Supplementary material for: The performance of body mass component indices in detecting risk of musculoskeletal injuries in physically active young men and women
Source: PeerJ. 2022 Jan 26;10:e12745. doi: 10.7717/peerj.12745 (PMC8800385; doi:10.7717/peerj.12745)
Supplement: Supplemental Information 5 [file peerj-10-12745-s005.xlsx]

## Sheet: Arkusz1
sex	age (years)	Body height 9cm0	Body mass (kg)	BMI (kg/m2)	FMI (fat kg/m2)	SMI (muscle mass/kg2)	MFR (muscle kg/fat kg)	Body Fat kg	Body Muscle Mass _kg	physical activty (MET)	Injury_ 1=yes; 0=no
m	25.0658	1.77	72.1	23.01	3.70264	13.3064	3.59375	11.6	41.6875	3359.5	0
k	23.8055	1.77	79.75	25.46	9.0172	12.4868	1.38478	28.25	39.12	840	1
k	22.2055	1.75	55.55	18.14	3.11837	8.12425	2.60529	9.55	24.8805	1794	0
k	22.2521	1.61	56.5	21.8	5.97971	8.404	1.40542	15.5	21.784	3252	1
m	24.0082	1.91	97.65	26.77	3.98838	19.7186	4.94402	14.55	71.9355	3306	1
m	23.3507	1.73	69.78	23.32	4.51	12.35	2.79	13.03	38.04	3714	1
k	23.8301	1.59	56.05	22.17	5.99264	8.44112	1.40858	15.15	21.34	4452	0
m	24.9123	1.79	64.9	20.26	4.46303	9.5977	2.15049	14.3	30.752	2286	0
k	24.2137	1.63	51.6	19.42	4.00843	7.6036	1.8969	10.65	20.202	3972	0
m	23.4411	1.72	62.95	21.28	1.97742	11.1859	5.65684	5.85	33.0925	2106	0
k	24.4192	1.68	49.45	17.52	3.25964	6.76729	2.07609	9.2	19.1	975	0
k	22.1479	1.68	70.45	24.96	7.59992	11.6975	1.53916	21.45	33.015	9575	0
k	23.4082	1.63	54.45	20.49	4.38481	8.25172	1.88189	11.65	21.924	3528	0
m	24.0521	1.81	94.1	28.72	5.31119	20.8422	3.92421	17.4	68.2812	758	0
m	22.5068	1.74	72.6	23.98	3.74884	13.8288	3.68881	11.35	41.868	3252	0
m	23.7452	1.73	72.65	24.27	6.29824	12.4638	1.97894	18.85	37.303	2786	0
m	22.9288	1.96	104.95	27.32	5.77884	21.8924	3.78838	22.2	84.102	2634	1
m	23.4	1.8	83.85	25.88	5.16975	15.7407	3.04478	16.75	51	3144	1
m	25.0384	1.67	78.95	28.31	4.60755	17.7749	3.85778	12.85	49.5725	697	0
m	23.4877	1.7	95.55	33.06	8.52941	21.9225	2.57022	24.65	63.356	3492	1
m	24.3836	1.9	86.6	23.99	4.52909	15.9136	3.51364	16.35	57.448	8784	0
m	23.6959	1.85	78.8	23.02	3.72535	14.1176	3.78961	12.75	48.3175	3055	0
m	23.5726	1.74	70.25	23.2	3.98005	12.7857	3.21245	12.05	38.71	2613	0
m	22.3041	1.79	92.25	28.79	8.62957	18.3814	2.13005	27.65	58.896	1946	0
k	22.9699	1.7	50.95	17.63	3.2699	7.22561	2.20974	9.45	20.882	792	0
m	23.389	1.9	89.8	24.88	3.93352	18.1244	4.60768	14.2	65.429	8940	0
m	23.8767	1.8	74.95	23.13	3.88889	13.7153	3.52679	12.6	44.4375	3906	0
m	25.9918	1.75	67.55	22.06	3.24898	11.967	3.68332	9.95	36.649	3135	0
m	24.7397	1.89	87.75	24.57	4.00325	17.4033	4.34731	14.3	62.1665	1032	1
k	23.9342	1.66	55.7	20.21	3.62897	8.66236	2.387	10	23.87	9855	0
m	23.4466	1.85	86.6	25.3	4.49963	17.2093	3.82461	15.4	58.899	2622	1
m	25.526	1.91	91.65	25.12	5.04372	16.992	3.36894	18.4	61.9885	3150	0
k	25.9068	1.78	96.35	30.41	11.2833	16.529	1.46491	35.75	52.3705	8940	1
k	24.2329	1.67	55	19.72	4.39241	8.28768	1.88682	12.25	23.1135	1550	1
k	22.4712	1.65	58.4	21.45	5.60147	8.87438	1.5843	15.25	24.1605	5598	0
m	22.2192	1.8	72	22.22	3.88889	12.3593	3.1781	12.6	40.044	1579.5	1
k	22.5644	1.71	57.8	19.77	4.08673	8.77706	2.1477	11.95	25.665	8586	0
m	26.0356	1.69	77.75	27.22	5.63706	16.4	2.90932	16.1	46.84	5266	1
k	22.8877	1.61	49.2	18.98	4.03148	7.08885	1.75837	10.45	18.375	9306	0
k	24.4904	1.74	66.95	22.11	4.9379	11.41	2.3107	14.95	34.545	4404	0
k	22.2986	1.66	57.6	20.9	4.48178	9.35187	2.08664	12.35	25.77	615	1
k	22.8082	1.67	86.6	31.05	5.52189	16.0214	2.90143	15.4	44.682	8274	0
m	26.2027	1.83	90.75	27.1	6.22592	18.2549	2.93209	20.85	61.134	7560	1
k	24.1726	1.74	70.85	23.4	6.65544	11.6097	1.74439	20.15	35.1495	3573	0
k	22.8082	1.58	53.5	21.43	4.06585	8.73638	2.14872	10.15	21.8095	5706	0
k	24.3123	1.68	50.3	17.82	2.88761	7.36961	2.55215	8.15	20.8	6337.5	0
k	22.6548	1.65	57.15	20.99	4.77502	10.1576	2.12723	13	27.654	1215	1
k	22.8795	1.53	57.15	24.41	5.55342	8.94955	1.61154	13	20.95	3619	0
k	24.6	1.61	50.2	19.37	4.16651	6.92566	1.66222	10.8	17.952	660	1
m	22.5096	1.78	80.6	25.44	5.31814	15.6707	2.94665	16.85	49.651	3510	0
k	22.3863	1.71	54.4	18.6	4.8049	7.20393	1.49929	14.05	21.065	1008	0
m	24.1671	1.74	90.1	29.76	6.98573	20.0054	2.86374	21.15	60.5682	924	0
m	24.011	1.73	68.25	22.8	4.42714	12.2206	2.76038	13.25	36.575	3234	0
k	24.4	1.6	55.05	21.5	5.33203	8.28984	1.55473	13.65	21.222	3252	0
k	22.4849	1.71	69.5	23.77	6.32673	11.752	1.85751	18.5	34.364	3615	0
m	23.6493	1.79	72.3	22.56	3.62036	13.4944	3.72737	11.6	43.2375	2293	1
m	24.1096	1.91	85.35	23.4	4.34473	15.2085	3.50044	15.85	55.482	3306	0
m	23.2466	1.77	79.05	25.23	3.04829	16.4445	5.39466	9.55	51.519	4950	0
m	24.8712	1.81	80.9	24.69	6.10482	13.95	2.28507	20	45.7015	9704	0
m	24.7534	1.78	83.85	26.46	4.62378	15.991	3.45843	14.65	50.666	2688	0
m	24.1014	1.8	70.6	21.79	4.15123	11.8044	2.84359	13.45	38.2463	2148	0
m	23.937	1.82	92.45	27.91	6.83794	18.228	2.66572	22.65	60.3785	3748.5	1
m	26.6493	1.79	78.1	24.38	2.24712	16.4077	7.30167	7.2	52.572	8106	1
m	24.1096	1.63	70.5	26.53	5.08111	13.859	2.72756	13.5	36.822	3993	1
m	22.9507	1.88	80.65	22.82	3.50837	14.6786	4.18387	12.4	51.88	819	0
k	22.6274	1.62	53.8	20.5	4.70584	8.8464	1.87988	12.35	23.2165	1920	0
k	23.2247	1.68	59.15	20.96	3.95054	9.84464	2.49197	11.15	27.7855	4866	0
m	22.4438	1.79	85.15	26.58	4.18214	18.5046	4.42466	13.4	59.2905	3200	1
m	23.7945	1.91	82.2	22.53	2.52186	15.8847	6.2988	9.2	57.949	4479	0
m	23.189	1.85	88.25	25.79	4.82104	17.735	3.67867	16.5	60.698	2553	0
k	23.9945	1.66	66.65	24.19	5.75192	11.5565	2.00915	15.85	31.845	3939	0
m	23.7726	1.8	82.8	25.56	7.1142	14.8881	2.09273	23.05	48.2375	1807.5	0
k	22.1973	1.79	64.5	20.13	4.6659	9.5448	2.04565	14.95	30.5825	7332	0
k	24.9479	1.67	60.1	21.55	5.66532	9.34813	1.65006	15.8	26.071	8280	1
k	22.4219	1.62	46.4	17.68	2.55296	6.74268	2.64112	6.7	17.6955	4914	0
m	24.0849	1.82	79.95	24.14	4.30202	15.2713	3.54979	14.25	50.5845	5724	0
m	23.8932	1.8	73.65	22.73	3.02469	14.5073	4.7963	9.8	47.0037	693	0
m	25.611	1.73	74.35	24.84	3.95937	15.8776	4.01013	11.85	47.52	1297.5	1
m	24.7918	1.73	70.7	23.62	5.16222	12.4426	2.41032	15.45	37.2395	2148	0
k	22.5014	1.76	69.88	22.56	4.51	12.35	2.79	13.03	38.05	2097	1
m	24.9397	1.82	79.95	24.14	3.13972	15.9643	5.08462	10.4	52.88	1704	0
m	23.4164	1.81	81.65	24.92	3.93761	14.9606	3.79942	12.9	49.0125	8250	1
m	24.9123	1.86	90.5	26.16	4.68262	18.7877	4.01222	16.2	64.998	1746	0
m	22.4247	1.74	69.78	23.05	4.51	12.35	2.79	13.03	38.15	2260	1
m	27.8274	1.83	86.05	25.7	3.44889	18.6175	5.3981	11.55	62.348	8106	0
m	25.0877	1.95	70.7	18.59	3.73439	15.5201	4.15599	14.2	59.015	3066	0
m	23.7644	1.75	73.25	23.92	2.82449	13.6333	4.82682	8.65	41.752	3276	0
m	23.5014	1.8	84.75	26.16	3.47222	18.338	5.28133	11.25	59.415	1512	1
m	23.3699	1.92	106.7	28.94	4.46235	24.9185	5.58416	16.45	91.8595	1404	0
m	23.3315	1.76	64.95	20.97	2.87319	11.6897	4.06854	8.9	36.21	7980	0
m	23.1945	1.8	83.9	25.9	5.3858	15.9824	2.96751	17.45	51.783	4260	0
k	23.8986	1.53	44.75	19.12	2.07185	7.43774	3.5899	4.85	17.411	3066	0
k	23.8384	1.83	64.3	19.2	3.80722	9.64705	2.53388	12.75	32.307	3342	0
m	22.263	1.76	72.75	23.49	3.56728	13.2425	3.71222	11.05	41.02	2373	0
k	23.3315	1.64	71.65	26.64	8.71877	11.5668	1.32665	23.45	31.11	3870	0
m	25.2247	1.72	63.2	21.36	3.2619	11.0005	3.37244	9.65	32.544	1399.5	0
k	22.7836	1.59	67.6	26.74	9.1373	11.6985	1.2803	23.1	29.575	1188	1
m	22.3863	1.81	99.75	30.45	7.18843	20.1105	2.79762	23.55	65.884	2295	0
k	23.1068	1.67	62.45	22.39	6.57966	9.45373	1.43681	18.35	26.3655	6639	0
m	25.1726	1.75	84.2	27.49	4.78367	17.7202	3.70431	14.65	54.2681	6399	1
k	26.1178	1.54	57.6	24.29	5.14421	10.5406	2.04902	12.2	24.998	1386	0
m	22.3233	1.73	72.2	24.12	4.22667	14.171	3.35277	12.65	42.4125	7866	0
m	22.337	1.76	84.75	27.36	4.79403	16.72	3.48768	14.85	51.792	749	0
k	22.3151	1.62	58	22.1	5.16308	9.48712	1.83749	13.55	24.898	3342	0
m	24.0192	1.91	81.6	22.37	4.87925	13.6213	2.79169	17.8	49.692	2148	1
m	22.1479	1.8	77.1	23.8	3.73457	15.4375	4.13368	12.1	50.0175	5706	1
k	23.0904	1.63	63.6	23.94	6.45489	10.4569	1.62	17.15	27.783	8302	0
k	23.0904	1.59	54.55	21.58	4.41043	8.96325	2.03229	11.15	22.66	1611	1
k	22.9918	1.77	79.1	25.25	8.63417	12.4568	1.44274	27.05	39.026	7386	0
k	25.1781	1.69	65.65	22.99	6.68744	10.5234	1.57361	19.1	30.056	3195	1
k	23.3014	1.69	58.25	20.39	5.04184	8.44788	1.67556	14.4	24.128	5424	0
k	23.0274	1.71	80.1	27.39	8.99422	13.8056	1.53494	26.3	40.369	5340	0
k	22.9753	1.76	63.65	20.55	5.13301	9.36983	1.82541	15.9	29.024	4386	0
k	25.1178	1.76	59.45	19.19	4.29365	8.76679	2.0418	13.3	27.156	2457	0
k	23.9808	1.83	83.8	25.02	7.74881	13.4549	1.73638	25.95	45.059	3363	0
m	22.6767	1.7	79.4	27.47	5.39792	17.4042	3.22423	15.6	50.298	2346	0
k	22.7781	1.6	66.25	25.88	6.73828	12.3516	1.83304	17.25	31.62	3588	0
k	23.7397	1.83	76.5	22.84	6.07662	12.0959	1.99057	20.35	40.508	2232	0
k	23.9205	1.57	61.75	25.05	7.2011	10.6708	1.48183	17.75	26.3025	2706	0
